# Supplementary material for: Genomic Organization and Comparative Phylogenic Analysis of NBS-LRR Resistance Gene Family in Solanum pimpinellifolium and Arabidopsis thaliana
Source: PubMed Central journal article supplement — Evol Bioinform Online. 2020 Mar 6;16:1176934320911055. doi: 10.1177/1176934320911055 (PMC7065440; doi:10.1177/1176934320911055), 2020-03-06
Supplement: Table_S2_xyz33056ee822a92.pdf [file Table_S2_xyz33056ee822a92.pdf]

**Table S2:** Homology comparison between *S. pimpinellifolium* NBS-LRRs and some cloned R genes in *Solanaceae*.

| Gene name       | Query Name<br>Total | Species                      | Size   | Pathogen                      | Sopim NBS-LRR hit      | Identities | Chromosome | Subfamily | Cluster*  |
|-----------------|---------------------|------------------------------|--------|-------------------------------|------------------------|------------|------------|-----------|-----------|
| <i>Nrc1</i>     | ABC26878            | <i>Solanum lycopersicum</i>  | 888aa  |                               | Sopim01g090430.0.<br>1 | 100        | 1          | CNL       | singleton |
| <i>Rx</i>       | CAB50786            | <i>Solanum tuberosum</i>     | 937aa  | Potato virus X                | Sopim12g010660.0.<br>1 | 91         | 12         | N         | singleton |
| <i>Rx2</i>      | CAB56299            | <i>Solanum acaule</i>        | 938aa  | Potato virus X                | Sopim12g010660.0.<br>1 | 93         | 12         | N         | singleton |
| <i>Gpa2</i>     | AF195939            | <i>Solanum tuberosum</i>     | 912aa  | <i>Globodera pallida</i> /PVX | Sopim12g010660.0.<br>1 | 93         | 12         | N         | singleton |
| <i>PSH-RGH6</i> | ABY61745            | <i>Solanum tuberosum</i>     | 873aa  | Potato cyst nematode          | Sopim12g010660.0.<br>1 | 93         | 12         | N         | singleton |
| <i>Rpi-vnt1</i> | ADB85628            | <i>Solanum medians</i>       | 860aa  | Phytophthora infestans        | Sopim09g092300.0.<br>1 | 86         | 9          | CN        | C9-1      |
| <i>Rpi-blb2</i> | AAZ95005            | <i>Solanum bulbocastanum</i> | 1267aa | Phytophthora infestans        | Sopim06g008450.0.<br>1 | 81         | 6          | CNL       | C6-1      |
| <i>Rpi-bt1</i>  | ACI16480            | <i>Solanum bulbocastanum</i> | 988aa  | Phytophthora infestans        | Sopim08g075630.0.<br>1 | 81         | 8          | CNL       | C8-2      |
| <i>Rpi-blb3</i> | ACU65457            | <i>Solanum bulbocastanum</i> | 847aa  | Phytophthora infestans        | Sopim04g009660.0.<br>1 | 82         | 4          | CNL       | C4-6      |
| <i>R2</i>       | ADL59405            | <i>Solanum schenckii</i>     | 844aa  | Phytophthora infestans        | Sopim04g009660.0.<br>1 | 82         | 4          | CNL       | C4-6      |
| <i>R1</i>       | AAU95638            | <i>Solanum tuberosum</i>     | 514aa  | Phytophthora infestans        | Sopim05g007630.0.<br>1 | 41         | 5          | CN        | C5-1      |
| <i>Gro1-4</i>   | AAP44390            | <i>Solanum tuberosum</i>     | 1136aa | Phytophthora infestans        | Sopim07g055380.0.      | 82         | 7          | NL        | C7-5      |

|                   |            |                                       |       |                                  |                   |     |    |     |          |
|-------------------|------------|---------------------------------------|-------|----------------------------------|-------------------|-----|----|-----|----------|
|                   |            |                                       | a     |                                  | 1                 |     |    |     |          |
| <i>Mi-1</i>       | AAC97933   | Solanum lycopersicum                  | 1257a | <i>Meloidogyne javanica</i>      | Sopim06g008450.0. | 91  | 6  | CNL | C6-1     |
|                   |            |                                       | a     |                                  | 1                 |     |    |     |          |
| <i>Rpi-blb1/R</i> | RGA2_SOLBU | Solanum bulbocastanum                 | 970aa | <i>Phytophthora infestans</i>    | Sopim08g075640.0. | 72  | 8  | CNL | C8-2     |
| <i>B</i>          |            |                                       |       |                                  | 1                 |     |    |     |          |
| <i>R3a</i>        | AAW48299   | Solanum tuberosum                     | 1282a | <i>Phytophthora infestans</i>    | Sopim08g007630.0. | 80  | 8  | CNL | C8-2     |
|                   |            |                                       | a     |                                  | 1                 |     |    |     |          |
| <i>Tm-2</i>       | AAQ10735   | Solanum lycopersicum                  | 861aa | Tobacco mosaic virus             | Sopim09g018220.0. | 95  | 9  | CNL | singleto |
|                   |            |                                       |       |                                  | 1                 |     |    |     | n        |
| <i>NL25</i>       | CAA08797   | Solanum tuberosum                     | 533aa |                                  | Sopim01g008800.0. | 60  | 1  | TNL | singleto |
|                   |            |                                       |       |                                  | 1                 |     |    |     | n        |
| <i>I2</i>         | ABB00396   | Solanum lycopersicum                  | 242aa | <i>Fusarium oxysporum</i>        | Sopim08g007630.0. | 90  | 8  | CNL | C8-2     |
|                   |            |                                       |       |                                  | 1                 |     |    |     |          |
| <i>Bs4</i>        | AAR21295   | Solanum lycopersicum                  | 1146a | <i>Xanthomonas campestris</i>    | Sopim05g007850.0. | 100 | 5  | TNL | singleto |
|                   |            |                                       | a     |                                  | 1                 |     |    |     | n        |
| <i>Hero</i>       | CAD29729   | Solanum lycopersicum                  | 1293a | <i>Globodera rostochiensis</i>   | Sopim04g008200.0. | 80  | 4  | CNL | C4-3     |
|                   |            |                                       | a     |                                  | 1                 |     |    |     |          |
| <i>RGA2</i>       | AAP45188   | Solanum bulbocastanum                 | 940aa | <i>Phytophthora infestans</i>    | Sopim08g075640.0. | 69  | 8  | CNL | C8-2     |
|                   |            |                                       |       |                                  | 1                 |     |    |     |          |
| <i>RY-1</i>       | CAC82812   | Solanum tuberosum subsp.<br>andigenum | 1101a | Potato virus Y                   | Sopim11g011080.0. | 85  | 11 | TNL | C11-2    |
|                   |            |                                       | a     |                                  | 1                 |     |    |     |          |
| <i>NL27</i>       | CAA08798   | Solanum tuberosum                     | 821aa | Potato leaf roll<br>polverovirus | Sopim01g008800.0. | 68  | 1  | TNL | singleto |
|                   |            |                                       |       |                                  | 1                 |     |    |     | n        |
| <i>Sw5-a</i>      | AAG31013   | Solanum lycopersicum                  | 1245a | Tospovirus                       | Sopim09g098130.0. | 95  | 9  | CN  | C9-2     |
|                   |            |                                       | a     |                                  | 1                 |     |    |     |          |
| <i>Prf</i>        | AAC49408   | Solanum lycopersicum                  | 1824a | <i>Pseudomonas syringae</i>      | Sopim05g013280.0. | 98  | 5  | CN  | C5-5     |

|                         |          |                             |       |                               |                   |    |   |     |           |
|-------------------------|----------|-----------------------------|-------|-------------------------------|-------------------|----|---|-----|-----------|
|                         |          |                             | a     |                               | 1                 |    |   |     |           |
| <i>Tm-2<sup>2</sup></i> | AAQ10736 | <i>Solanum lycopersicum</i> | 861aa | Tobacco mosaic virus          | Sopim09g018220.0. | 95 | 9 | CNL | singleton |
|                         |          |                             |       |                               | 1                 |    |   |     |           |
| <i>Bs2</i>              | AF202179 | <i>Capsicum chacoense</i>   | 905aa | <i>Xanthomonas campestris</i> | Sopim02g027080.0. | 66 | 2 | CN  | singleton |
|                         |          |                             |       |                               | 1                 |    |   |     |           |
| <i>N</i>                | AAA50763 | <i>Nicotiana glutinosa</i>  | 1144a | Tobacco mosaic virus          | Sopim01g008800.0. | 65 | 1 | TNL | singleton |
|                         |          |                             | a     |                               | 1                 |    |   |     |           |

\*“C” refers to gene family, number after “C” refers to chromosome number, number after “-” refer to gene cluster number on that chromosome. For example, C9-1 represent the first gene cluster on chromosome 9.
